# Supplementary material for: Genetic Dissection of Anopheles gambiae Gut Epithelial Responses to Serratia marcescens
Source: PLoS Pathog. 2014 Mar 6;10(3):e1003897. doi: 10.1371/journal.ppat.1003897 (PMC3946313; doi:10.1371/journal.ppat.1003897)
Supplement: Table S3 — Individual SNP loci associated with the S. marcescens infection phenotype. A total of 140 out of 400,071 SNP loci that showed MAF difference >0.5 between the highly infected and non-infected S. marcescens phenotypic pools are shown. Each column contains for each SNP locus: the chromosome it resides, the MAF for the highly infected and non-infected phenotypic pools and the calculated MAF difference, the genomic position of the SNP locus and the calculated 5 kb radius (position −5 kb and position +5 kb columns), the residing peak for each SNP locus as assigned in Figure 2 and genes found within a 5 kb radius of this SNP locus based on the AgamP3.7 annotation of the An. gambiae genome. (XLSX) [file ppat.1003897.s009.xlsx]

## Sheet: 01
SNP	Chromosome	MAF Highly Infected	MAF Non-infected	MAF Difference	Position	Position -5kb	Position +5kb	Peak (Figure 2)	Gene hits
Ag_2L_003518656	2L	0.207045	0.744098	0.537053	3518656	3513656	3523656	2L-1	AGAP004783	AGAP004784
Ag_2L_005323700	2L	0.282146	0.887381	0.605235	5323700	5318700	5328700	2L-2
Ag_2L_006129603	2L	0.196137	0.759368	0.56323	6129603	6124603	6134603		AGAP004931
Ag_2L_009499844	2L	0.0741916	0.591165	0.516973	9499844	9494844	9504844	2L-4
Ag_2L_010421601	2L	0.77696	0.235987	0.540973	10421601	10416601	10426601
Ag_2L_010482763	2L	0.0846498	0.689077	0.604427	10482763	10477763	10487763		AGAP005143
Ag_2L_010562614	2L	0.86293	0.25781	0.605119	10562614	10557614	10567614		AGAP005147
Ag_2L_010693205	2L	0.354979	0.86838	0.513402	10693205	10688205	10698205		AGAP005156
Ag_2L_012210700	2L	0.109864	0.62603	0.516166	12210700	12205700	12215700	2L-5	AGAP005203	AGAP005205
Ag_2L_012228038	2L	0.123258	0.80254	0.679282	12228038	12223038	12233038		AGAP005206
Ag_2L_012239158	2L	0.943191	0.154516	0.788675	12239158	12234158	12244158
Ag_2L_012327390	2L	0.895938	0.271609	0.624329	12327390	12322390	12332390
Ag_2L_012416410	2L	0.0738067	0.76109	0.687283	12416410	12411410	12421410		AGAP005216	AGAP005217
Ag_2L_012450546	2L	0.691982	0.109288	0.582695	12450546	12445546	12455546
Ag_2L_012569927	2L	0.61959	0.0760967	0.543493	12569927	12564927	12574927
Ag_2L_012823420	2L	0.0505316	0.631809	0.581277	12823420	12818420	12828420		AGAP005244
Ag_2L_013668860	2L	0.226272	0.778515	0.552243	13668860	13663860	13673860		AGAP005287
Ag_2L_016074637	2L	0.709557	0.197121	0.512435	16074637	16069637	16079637	2L-6	AGAP005473	AGAP005474	AGAP005475	AGAP005476	AGAP005477	AGAP005478	AGAP005479
Ag_2L_016227362	2L	0.259492	0.762788	0.503296	16227362	16222362	16232362		AGAP005497
Ag_2L_018440454	2L	0.601875	0.0634193	0.538455	18440454	18435454	18445454	2L-7	AGAP005661
Ag_2L_019303208	2L	0.653426	0.143191	0.510235	19303208	19298208	19308208
Ag_2L_021674505	2L	0.745371	0.236296	0.509075	21674505	21669505	21679505	2L-8
Ag_2L_027924370	2L	0.851985	0.248017	0.603968	27924370	27919370	27929370	2L-9	AGAP006186
Ag_2L_031407343	2L	0.725297	0.154941	0.570356	31407343	31402343	31412343	2L-10	AGAP006405
Ag_2L_031764861	2L	0.878146	0.353295	0.524851	31764861	31759861	31769861		AGAP006428
Ag_2L_031831396	2L	0.421969	0.936556	0.514586	31831396	31826396	31836396
Ag_2L_035563670	2L	0.0961665	0.623706	0.52754	35563670	35558670	35568670	2L-11	AGAP006643	AGAP006644
Ag_2L_038192521	2L	0.837001	0.326097	0.510905	38192521	38187521	38197521	2L-12	AGAP006784	AGAP006785
Ag_2L_040933889	2L	0.749392	0.187269	0.562123	40933889	40928889	40938889	2L-13	AGAP007012
Ag_2L_041612176	2L	0.26215	0.946363	0.684213	41612176	41607176	41617176		AGAP007045
Ag_2L_041971478	2L	0.214685	0.729177	0.514492	41971478	41966478	41976478
Ag_2L_042790121	2L	0.693402	0.148292	0.545109	42790121	42785121	42795121	2L-14	AGAP007104
Ag_2L_042879419	2L	0.896494	0.395112	0.501382	42879419	42874419	42884419
Ag_2L_043431017	2L	0.111721	0.848788	0.737067	43431017	43426017	43436017
Ag_2L_043585853	2L	0.900493	0.371255	0.529238	43585853	43580853	43590853		AGAP007148	AGAP007149	AGAP007150	AGAP007151	AGAP007152	AGAP007153	AGAP007154
Ag_2L_043726092	2L	0.644694	0.144544	0.50015	43726092	43721092	43731092
Ag_2L_044010910	2L	0.722831	0.182478	0.540353	44010910	44005910	44015910
Ag_2L_044057845	2L	0.45987	0.961602	0.501733	44057845	44052845	44062845		AGAP007181
Ag_2L_045022088	2L	0.289452	0.827708	0.538256	45022088	45017088	45027088	2L-15	AGAP007291	AGAP007292
Ag_2L_046250290	2L	0.359071	0.893906	0.534835	46250290	46245290	46255290	2L-16	AGAP007387	AGAP007388
Ag_2L_046421090	2L	0.310598	0.864846	0.554248	46421090	46416090	46426090		AGAP007415
Ag_2L_047521026	2L	0.313049	0.825279	0.51223	47521026	47516026	47526026	2L-17	AGAP007550
Ag_2L_048801371	2L	0.70511	0.158254	0.546856	48801371	48796371	48806371	2L-18	AGAP007657
Ag_2L_049299743	2L	0.933978	0.267733	0.666245	49299743	49294743	49304743		AGAP007723
Ag_2R_000465473	2R	0.817224	0.246527	0.570698	465473	460473	470473	2R-1
Ag_2R_000775042	2R	0.390339	0.906831	0.516492	775042	770042	780042		AGAP001179
Ag_2R_002747832	2R	0.697269	0.196329	0.500941	2747832	2742832	2752832	2R-2
Ag_2R_005170891	2R	0.735951	0.232389	0.503562	5170891	5165891	5175891	2R-3	AGAP001446
Ag_2R_012714381	2R	0.353138	0.871015	0.517877	12714381	12709381	12719381	2R-5	AGAP001944
Ag_2R_015263254	2R	0.821628	0.110523	0.711105	15263254	15258254	15268254	2R-6	AGAP002094
Ag_2R_023401663	2R	0.856929	0.334817	0.522112	23401663	23396663	23406663	2R-8
Ag_2R_024127613	2R	0.835885	0.272123	0.563762	24127613	24122613	24132613
Ag_2R_024713048	2R	0.104336	0.781504	0.677168	24713048	24708048	24718048
Ag_2R_024728111	2R	0.923205	0.406796	0.516409	24728111	24723111	24733111
Ag_2R_024803451	2R	0.200089	0.853893	0.653804	24803451	24798451	24808451
Ag_2R_024804136	2R	0.206979	0.781498	0.57452	24804136	24799136	24809136
Ag_2R_024873492	2R	0.737441	0.212932	0.524509	24873492	24868492	24878492		AGAP013110	AGAP013353	AGAP013322	AGAP013225	AGAP013456	AGAP013086
Ag_2R_025058493	2R	0.175145	0.728794	0.553649	25058493	25053493	25063493
Ag_2R_025258455	2R	0.628796	0.117926	0.51087	25258455	25253455	25263455		AGAP002665	AGAP002667	AGAP002666	AGAP002664
Ag_2R_026906125	2R	0.079002	0.855966	0.776964	26906125	26901125	26911125	2R-9
Ag_2R_032804506	2R	0.268194	0.810255	0.542062	32804506	32799506	32809506	2R-11
Ag_2R_033238552	2R	0.253204	0.770977	0.517773	33238552	33233552	33243552
Ag_2R_035225086	2R	0.252157	0.761609	0.509451	35225086	35220086	35230086	2R-12
Ag_2R_035238077	2R	0.629499	0.0816004	0.547899	35238077	35233077	35243077
Ag_2R_035578739	2R	0.125058	0.697752	0.572694	35578739	35573739	35583739
Ag_2R_048020283	2R	0.70946	0.116221	0.593239	48020283	48015283	48025283	2R-13	AGAP004032
Ag_2R_051472055	2R	0.19725	0.736036	0.538786	51472055	51467055	51477055	2R-14
Ag_2R_051612164	2R	0.124026	0.647729	0.523703	51612164	51607164	51617164
Ag_2R_051875990	2R	0.329411	0.834896	0.505485	51875990	51870990	51880990		AGAP004208
Ag_2R_052153947	2R	0.73518	0.185597	0.549583	52153947	52148947	52158947		AGAP004223
Ag_2R_052758256	2R	0.746474	0.173507	0.572967	52758256	52753256	52763256
Ag_2R_055777531	2R	0.141178	0.669036	0.527858	55777531	55772531	55782531	2R-15	AGAP004405
Ag_2R_059805200	2R	0.300164	0.814251	0.514087	59805200	59800200	59810200	2R-16
Ag_3L_002543806	3L	0.818856	0.258141	0.560715	2543806	2538806	2548806	3L-1
Ag_3L_002637624	3L	0.130165	0.657222	0.527056	2637624	2632624	2642624		AGAP010394
Ag_3L_003457739	3L	0.122721	0.82545	0.70273	3457739	3452739	3462739	3L-2
Ag_3L_004302915	3L	0.185501	0.718148	0.532647	4302915	4297915	4307915	3L-3
Ag_3L_005119760	3L	0.945501	0.385445	0.560056	5119760	5114760	5124760	3L-4	AGAP010503
Ag_3L_005203143	3L	0.789626	0.258052	0.531575	5203143	5198143	5208143
Ag_3L_008405079	3L	0.199974	0.729413	0.529439	8405079	8400079	8410079	3L-5
Ag_3L_009319745	3L	0.28552	0.814431	0.528911	9319745	9314745	9324745	3L-6
Ag_3L_010558698	3L	0.71998	0.208908	0.511073	10558698	10553698	10563698	3L-7	AGAP010798
Ag_3L_010732196	3L	0.812058	0.307283	0.504776	10732196	10727196	10737196
Ag_3L_013522657	3L	0.906162	0.337747	0.568415	13522657	13517657	13527657	3L-8	AGAP010940	AGAP010941
Ag_3L_014194976	3L	0.27088	0.778425	0.507544	14194976	14189976	14199976
Ag_3L_017475128	3L	0.293602	0.829224	0.535621	17475128	17470128	17480128	3L-9
Ag_3L_017910149	3L	0.93855	0.437809	0.500741	17910149	17905149	17915149
Ag_3L_017918407	3L	0.122731	0.832017	0.709286	17918407	17913407	17923407
Ag_3L_017984337	3L	0.426902	0.931945	0.505043	17984337	17979337	17989337		AGAP011147	AGAP011148	AGAP011149	AGAP011150	AGAP011151
Ag_3L_020065464	3L	0.190462	0.73499	0.544529	20065464	20060464	20070464	3L-10
Ag_3L_020485207	3L	0.159663	0.834857	0.675194	20485207	20480207	20490207		AGAP011277	AGAP011278
Ag_3L_022008938	3L	0.263534	0.823843	0.560309	22008938	22003938	22013938	3L-11	AGAP011363
Ag_3L_024035717	3L	0.802856	0.279485	0.52337	24035717	24030717	24040717	3L-12	AGAP011415
Ag_3L_025747899	3L	0.838139	0.158137	0.680002	25747899	25742899	25752899	3L-13	AGAP011506
Ag_3L_027890931	3L	0.462512	0.972054	0.509542	27890931	27885931	27895931	3L-14	AGAP011566
Ag_3L_028103457	3L	0.850652	0.332178	0.518474	28103457	28098457	28108457
Ag_3L_029973214	3L	0.750452	0.176333	0.574119	29973214	29968214	29978214	3L-15	AGAP011618
Ag_3L_030153784	3L	0.913541	0.179044	0.734497	30153784	30148784	30158784
Ag_3L_033262927	3L	0.156324	0.684488	0.528165	33262927	33257927	33267927	3L-16	AGAP011784	AGAP011785	AGAP011786
Ag_3L_034218156	3L	0.250476	0.908244	0.657768	34218156	34213156	34223156	3L-17
Ag_3L_034222963	3L	0.118031	0.863455	0.745424	34222963	34217963	34227963
Ag_3L_034223030	3L	0.897929	0.236113	0.661816	34223030	34218030	34228030
Ag_3L_037418174	3L	0.229681	0.745598	0.515917	37418174	37413174	37423174	3L-18	AGAP012075
Ag_3L_039384389	3L	0.699746	0.119948	0.579798	39384389	39379389	39389389	3L-19	AGAP012252
Ag_3L_039575688	3L	0.112951	0.667694	0.554743	39575688	39570688	39580688
Ag_3L_041270221	3L	0.192779	0.787731	0.594951	41270221	41265221	41275221	3L-20
Ag_3L_041678356	3L	0.230753	0.80503	0.574277	41678356	41673356	41683356
Ag_3L_041718066	3L	0.294466	0.838539	0.544073	41718066	41713066	41723066		AGAP012395	AGAP012396	AGAP012397	AGAP012398
Ag_3R_005034029	3R	0.241179	0.800262	0.559083	5034029	5029029	5039029	3R-1	AGAP008068
Ag_3R_005034078	3R	0.752751	0.203325	0.549427	5034078	5029078	5039078		AGAP008068
Ag_3R_008966312	3R	0.231491	0.967945	0.736454	8966312	8961312	8971312	3R-2	AGAP008318	AGAP008319
Ag_3R_009999019	3R	0.570865	0.0476067	0.523258	9999019	9994019	10004019	3R-3
Ag_3R_013989461	3R	0.212483	0.731576	0.519093	13989461	13984461	13994461	3R-4	AGAP008648
Ag_3R_015038909	3R	0.275763	0.815351	0.539588	15038909	15033909	15043909	3R-5
Ag_3R_015129848	3R	0.74141	0.157547	0.583863	15129848	15124848	15134848		AGAP028214
Ag_3R_015637096	3R	0.289782	0.840552	0.55077	15637096	15632096	15642096		AGAP008702
Ag_3R_015754624	3R	0.0922605	0.70234	0.610079	15754624	15749624	15759624
Ag_3R_015978046	3R	0.216957	0.837824	0.620867	15978046	15973046	15983046		AGAP008712
Ag_3R_017548264	3R	0.793047	0.289019	0.504028	17548264	17543264	17553264	3R-6
Ag_3R_017824446	3R	0.581514	0.0530254	0.528489	17824446	17819446	17829446
Ag_3R_018435599	3R	0.260966	0.882968	0.622001	18435599	18430599	18440599		AGAP008819
Ag_3R_025188436	3R	0.77545	0.244836	0.530614	25188436	25183436	25193436	3R-7
Ag_3R_035422418	3R	0.397162	0.94343	0.546268	35422418	35417418	35427418	3R-9	AGAP009531	AGAP009532
Ag_3R_035658134	3R	0.140736	0.661877	0.52114	35658134	35653134	35663134
Ag_3R_037687542	3R	0.333741	0.862405	0.528664	37687542	37682542	37692542	3R-10	AGAP009661
Ag_3R_043677054	3R	0.705324	0.155339	0.549985	43677054	43672054	43682054	3R-11	AGAP009804	AGAP009805
Ag_3R_044167320	3R	0.264231	0.802136	0.537905	44167320	44162320	44172320		AGAP009848
Ag_3R_047682861	3R	0.0655564	0.62622	0.560664	47682861	47677861	47687861	3R-12	AGAP010015
Ag_3R_048730013	3R	0.744466	0.124648	0.619818	48730013	48725013	48735013	3R-13
Ag_3R_049768031	3R	0.87529	0.363631	0.511659	49768031	49763031	49773031	3R-14
Ag_3R_051193999	3R	0.869799	0.343596	0.526203	51193999	51188999	51198999	3R-15
Ag_3R_052001389	3R	0.116084	0.645752	0.529668	52001389	51996389	52006389		AGAP010281
Ag_X_002405425	X	0.390366	0.920798	0.530432	2405425	2400425	2410425	X-1	AGAP000150
Ag_X_010434384	X	0.710649	0.0840443	0.626605	10434384	10429384	10439384	X-2	AGAP000585
Ag_X_010651239	X	0.862766	0.227181	0.635585	10651239	10646239	10656239		AGAP000596	AGAP000595
Ag_X_010922663	X	0.911232	0.182891	0.728341	10922663	10917663	10927663
Ag_X_017126779	X	0.138701	0.68417	0.545469	17126779	17121779	17131779	X-3	AGAP000907	AGAP000908
Ag_X_019053317	X	0.263923	0.787967	0.524045	19053317	19048317	19058317	X-4	AGAP000998	AGAP001002	AGAP001004
Ag_X_020760306	X	0.166604	0.765198	0.598594	20760306	20755306	20765306	X-5
Ag_X_020977056	X	0.107393	0.673084	0.565691	20977056	20972056	20982056		AGAP001052
