# Supplementary material for: Genetic Dissection of Anopheles gambiae Gut Epithelial Responses to Serratia marcescens
Source: PLoS Pathog. 2014 Mar 6;10(3):e1003897. doi: 10.1371/journal.ppat.1003897 (PMC3946313; doi:10.1371/journal.ppat.1003897)
Supplement: Table S6 — 16S metagenomic profiling in FN3D1–3 or LacZ dsRNA treated mosquitoes retaining their natural gut microbiota. cDNA pools from Ab−Sm− mosquitoes following FN3D1–3 or LacZ dsRNA treatment were sequenced using 454 pyrosequencing targeting the V4–V6 region of the bacterial 16S rRNA transcript. Results are shown for each cDNA pool corresponding to a dsRNA treatment shown in Figure 4. In each case, taxonomic identification and alignment of reference sequences for each identified taxon is shown along with the number of sequence reads assigned. For each bacterial genus, the reference sequence with most alignment hits (sequence reads) is shown. For Serratia, the reference sequence with most alignment hits is highlighted and was used for categorization between Serratia and other Enterobacteriaceae. (XLSX) [file ppat.1003897.s012.xlsx]

## Sheet: Sheet1
dsRNA	Figure				dsRNA	Figure				dsRNA	Figure
lacZ	4A				FN3D1	4A				FN3D2	4A
Node	Reads	Total Reads	% prevalence		Node	Reads	Total Reads	% prevalence		Node	Reads	Total Reads	% prevalence
Enterobacteriaceae, 3047	3047	3661	83.2286		Enterobacteriaceae, 4690	4690	5352	87.6308		Enterobacteriaceae, 4242	4242	4735	89.5882
Acetobacteraceae, 610	610	3661	16.6621		Acetobacteraceae, 660	660	5352	12.3318		Acetobacteraceae, 490	490	4735	10.3485
Proteobacteria, 4	4	3661	0.10926		Proteobacteria, 1	1	5352	0.0186846		Proteobacteria, 2	2	4735	0.0422386
					Gammaproteobacteria, 1	1	5352	0.0186846		Bacteria, 1	1	4735	0.0211193
Reference sequence	Reads	Total Reads	% prevalence		Not assigned, 1	1	5352	0.0186846
Enterobacteriaceae, 3047										Reference sequence	Reads	Total Reads	% prevalence
alignment-Enterobacteriaceae-ref_NR_074869.1__Erwinia_tasmaniensis_Et1_99_strain_Et1_99_16S_ribosomal_RNA	2916	3661	79.6504		Reference sequence	Reads	Total Reads	% prevalence		Enterobacteriaceae, 4242
alignment-Enterobacteriaceae-ref_NR_028688.1__Citrobacter_murliniae_strain_CDC_2970_59_16S_ribosomal_RNA__partial	2907	3661	79.4045		Enterobacteriaceae, 4690					alignment-Enterobacteriaceae-ref_NR_028688.1__Citrobacter_murliniae_strain_CDC_2970_59_16S_ribosomal_RNA__partial	2935	4735	61.9852
alignment-Enterobacteriaceae-ref_NR_028803.1__Kluyvera_cryocrescens_strain_12993_16S_ribosomal_RNA__partial	1586	3661	43.3215		alignment-Enterobacteriaceae-ref_NR_028688.1__Citrobacter_murliniae_strain_CDC_2970_59_16S_ribosomal_RNA__partial	3461	5352	64.6674		alignment-Enterobacteriaceae-ref_NR_024996.1__Raoultella_planticola_strain_ATCC_33531_16S_ribosomal_RNA__partial	2225	4735	46.9905
alignment-Enterobacteriaceae-ref_NR_037085.1__Raoultella_terrigena_strain_84_16S_ribosomal_RNA__partial_sequence	1533	3661	41.8738		alignment-Enterobacteriaceae-ref_NR_074729.1__Klebsiella_variicola_At_22_strain_At_22_16S_ribosomal_RNA__complete	2324	5352	43.423		alignment-Enterobacteriaceae-ref_NR_074729.1__Klebsiella_variicola_At_22_strain_At_22_16S_ribosomal_RNA__complete	2014	4735	42.5343
alignment-Enterobacteriaceae-ref_NR_074729.1__Klebsiella_variicola_At_22_strain_At_22_16S_ribosomal_RNA__complete	817	3661	22.3163		alignment-Enterobacteriaceae-ref_NR_024996.1__Raoultella_planticola_strain_ATCC_33531_16S_ribosomal_RNA__partial	2215	5352	41.3864		alignment-Enterobacteriaceae-ref_NR_074777.1__Enterobacter_sp._638_strain_638_16S_ribosomal_RNA__complete_sequence	1890	4735	39.9155
alignment-Enterobacteriaceae-ref_NR_024643.1__Enterobacter_aerogenes_strain_JCM1235_16S_ribosomal_RNA__partial	542	3661	14.8047		alignment-Enterobacteriaceae-ref_NR_074777.1__Enterobacter_sp._638_strain_638_16S_ribosomal_RNA__complete_sequence	1914	5352	35.7623		alignment-Enterobacteriaceae-ref_NR_044385.1__Serratia_nematodiphila_strain_DZ0503SBS1_16S_ribosomal_RNA__partial	1862	4735	39.3242
alignment-Enterobacteriaceae-ref_NR_041973.1__Pectobacterium_cypripedii_strain_DSM_3873_16S_ribosomal_RNA	409	3661	11.1718		alignment-Enterobacteriaceae-ref_NR_044385.1__Serratia_nematodiphila_strain_DZ0503SBS1_16S_ribosomal_RNA__partial	1603	5352	29.9514		alignment-Enterobacteriaceae-ref_NR_074869.1__Erwinia_tasmaniensis_Et1_99_strain_Et1_99_16S_ribosomal_RNA	1139	4735	24.0549
alignment-Enterobacteriaceae-ref_NR_074820.1__Serratia_proteamaculans_568_strain_568_16S_ribosomal_RNA__complete	69	3661	1.88473		alignment-Enterobacteriaceae-ref_NR_074869.1__Erwinia_tasmaniensis_Et1_99_strain_Et1_99_16S_ribosomal_RNA	1298	5352	24.2526		alignment-Enterobacteriaceae-ref_NR_028803.1__Kluyvera_cryocrescens_strain_12993_16S_ribosomal_RNA__partial	889	4735	18.7751
alignment-Enterobacteriaceae-ref_NR_074908.1__Escherichia_blattae_DSM_4481_strain_DSM_4481_16S_ribosomal_RNA	50	3661	1.36575		alignment-Enterobacteriaceae-ref_NR_028803.1__Kluyvera_cryocrescens_strain_12993_16S_ribosomal_RNA__partial	865	5352	16.1622		alignment-Enterobacteriaceae-ref_NR_040930.1__Cedecea_neteri_strain_GTC1717_16S_ribosomal_RNA__partial_sequence	830	4735	17.529
alignment-Enterobacteriaceae-ref_NR_044800.1__Pantoea_stewartii_subsp._stewartii_strain_ATCC_8199_16S_ribosomal	24	3661	0.655559		alignment-Enterobacteriaceae-ref_NR_074764.1__Pectobacterium_wasabiae_WPP163_strain_WPP163_16S_ribosomal_RNA	398	5352	7.43647		alignment-Enterobacteriaceae-ref_NR_074764.1__Pectobacterium_wasabiae_WPP163_strain_WPP163_16S_ribosomal_RNA	466	4735	9.84161
alignment-Enterobacteriaceae-ref_NR_040930.1__Cedecea_neteri_strain_GTC1717_16S_ribosomal_RNA__partial_sequence	19	3661	0.518984		alignment-Enterobacteriaceae-ref_NR_040930.1__Cedecea_neteri_strain_GTC1717_16S_ribosomal_RNA__partial_sequence	302	5352	5.64275		alignment-Enterobacteriaceae-ref_NR_025331.1__Buttiauxella_izardii_strain_S3_2_161_16S_ribosomal_RNA__partial	195	4735	4.11827
					alignment-Enterobacteriaceae-ref_NR_074908.1__Escherichia_blattae_DSM_4481_strain_DSM_4481_16S_ribosomal_RNA	280	5352	5.23169		alignment-Enterobacteriaceae-ref_NR_074892.1__Shigella_dysenteriae_Sd197_strain_Sd197_16S_ribosomal_RNA__complete	193	4735	4.07603
Acetobacteraceae, 610					alignment-Enterobacteriaceae-ref_NR_074892.1__Shigella_dysenteriae_Sd197_strain_Sd197_16S_ribosomal_RNA__complete	137	5352	2.55979		alignment-Enterobacteriaceae-ref_NR_074902.1__Escherichia_fergusonii_ATCC_35469_strain_ATCC_35469_16S_ribosomal	132	4735	2.78775
alignment-Acetobacteraceae-ref_NR_025217.1__Swaminathania_salitolerans_strain_PA_51_16S_ribosomal_RNA__partial	610	3661	16.6621		alignment-Enterobacteriaceae-ref_NR_025331.1__Buttiauxella_izardii_strain_S3_2_161_16S_ribosomal_RNA__partial	121	5352	2.26084		alignment-Enterobacteriaceae-ref_NR_074910.1__Salmonella_enterica_subsp._enterica_serovar_Typhimurium_str.	83	4735	1.7529
alignment-Acetobacteraceae-ref_NR_024728.1__Asaia_bogorensis_strain_71_16S_ribosomal_RNA__partial_sequence	600	3661	16.389		alignment-Enterobacteriaceae-ref_NR_074985.1__Salmonella_enterica_subsp._enterica_serovar_Enteritidis_str.	120	5352	2.24215		alignment-Enterobacteriaceae-ref_NR_044729.1__Hafnia_alvei_16S_ribosomal_RNA__complete_sequence	59	4735	1.24604
alignment-Acetobacteraceae-ref_NR_074292.1__Gluconacetobacter_diazotrophicus_PAl_5_strain_PAl_5__ATCC_49037	549	3661	14.9959		alignment-Enterobacteriaceae-ref_NR_027544.1__Yersinia_frederiksenii_ATCC_33641_16S_ribosomal_RNA__partial	74	5352	1.38266		alignment-Enterobacteriaceae-ref_NR_044059.1__Cronobacter_muytjensii_strain_E603__ATCC_51329_16S_ribosomal	30	4735	0.63358
alignment-Acetobacteraceae-ref_NR_040998.1__Gluconobacter_thailandicus_strain_F149_1_16S_ribosomal_RNA__partial	485	3661	13.2477		alignment-Enterobacteriaceae-ref_NR_044729.1__Hafnia_alvei_16S_ribosomal_RNA__complete_sequence	55	5352	1.02765		alignment-Enterobacteriaceae-ref_NR_027544.1__Yersinia_frederiksenii_ATCC_33641_16S_ribosomal_RNA__partial	27	4735	0.570222
alignment-Acetobacteraceae-ref_NR_024773.1__Kozakia_baliensis_strain_Yo_3_16S_ribosomal_RNA__partial_sequence	15	3661	0.409724		alignment-Enterobacteriaceae-ref_NR_028786.1__Samsonia_erythrinae_strain_CFBP_5236_16S_ribosomal_RNA__partial	48	5352	0.896861		alignment-Enterobacteriaceae-ref_NR_028786.1__Samsonia_erythrinae_strain_CFBP_5236_16S_ribosomal_RNA__partial	24	4735	0.506864
					alignment-Enterobacteriaceae-ref_NR_074921.1__Rahnella_aquatilis_HX2_strain_HX2_16S_ribosomal_RNA__complete	41	5352	0.766069		alignment-Enterobacteriaceae-ref_NR_074921.1__Rahnella_aquatilis_HX2_strain_HX2_16S_ribosomal_RNA__complete	17	4735	0.359029
Proteobacteria, 4					alignment-Enterobacteriaceae-ref_NR_044757.1__Glossina_pallidipes_S_endosymbiont_16S_ribosomal_RNA__complete	22	5352	0.411061
alignment-Proteobacteria-ref_NR_028965.1__Burkholderia_tropica_strain_Ppe8_16S_ribosomal_RNA__partial_sequence	2	3661	0.0546299		alignment-Enterobacteriaceae-ref_NR_025335.1__Pragia_fontium_strain_DSM_5563_16S_ribosomal_RNA__partial_sequence	21	5352	0.392377		Acetobacteraceae, 490
alignment-Proteobacteria-ref_NR_041976.1__Erwinia_rhapontici_strain_DSM_4484_16S_ribosomal_RNA__partial	2	3661	0.0546299		alignment-Enterobacteriaceae-ref_NR_044076.1__Cronobacter_sakazakii_strain_ATCC_29544_16S_ribosomal_RNA__partial	12	5352	0.224215		alignment-Acetobacteraceae-ref_NR_025217.1__Swaminathania_salitolerans_strain_PA_51_16S_ribosomal_RNA__partial	490	4735	10.3485
alignment-Proteobacteria-ref_NR_024728.1__Asaia_bogorensis_strain_71_16S_ribosomal_RNA__partial_sequence	1	3661	0.0273149		alignment-Enterobacteriaceae-ref_NR_044800.1__Pantoea_stewartii_subsp._stewartii_strain_ATCC_8199_16S_ribosomal	11	5352	0.205531		alignment-Acetobacteraceae-ref_NR_024810.1__Asaia_krungthepensis_strain_AA08_16S_ribosomal_RNA__partial_sequence	487	4735	10.2851
alignment-Proteobacteria-ref_NR_024773.1__Kozakia_baliensis_strain_Yo_3_16S_ribosomal_RNA__partial_sequence	1	3661	0.0273149							alignment-Acetobacteraceae-ref_NR_074284.1__Gluconacetobacter_diazotrophicus_PAl_5_strain_PAl_5_16S_ribosomal	417	4735	8.80676
alignment-Proteobacteria-ref_NR_024875.1__Aquabacterium_commune_strain_B8_16S_ribosomal_RNA__partial_sequence	1	3661	0.0273149		Acetobacteraceae, 660					alignment-Acetobacteraceae-ref_NR_040998.1__Gluconobacter_thailandicus_strain_F149_1_16S_ribosomal_RNA__partial	356	4735	7.51848
alignment-Proteobacteria-ref_NR_024961.1__Alkalispirillum_mobile_strain_DSM_12769_16S_ribosomal_RNA__partial	1	3661	0.0273149		alignment-Acetobacteraceae-ref_NR_025217.1__Swaminathania_salitolerans_strain_PA_51_16S_ribosomal_RNA__partial	660	5352	12.3318		alignment-Acetobacteraceae-ref_NR_024773.1__Kozakia_baliensis_strain_Yo_3_16S_ribosomal_RNA__partial_sequence	27	4735	0.570222
alignment-Proteobacteria-ref_NR_025217.1__Swaminathania_salitolerans_strain_PA_51_16S_ribosomal_RNA__partial	1	3661	0.0273149		alignment-Acetobacteraceae-ref_NR_024738.1__Asaia_siamensis_strain_S60_1_16S_ribosomal_RNA__partial_sequence	642	5352	11.9955
alignment-Proteobacteria-ref_NR_025673.1__Schlegelella_thermodepolymerans_strain_K14_16S_ribosomal_RNA	1	3661	0.0273149		alignment-Acetobacteraceae-ref_NR_074292.1__Gluconacetobacter_diazotrophicus_PAl_5_strain_PAl_5__ATCC_49037	571	5352	10.6689		Proteobacteria, 2
alignment-Proteobacteria-ref_NR_026435.1__Gluconacetobacter_intermedius_strain_TF2_16S_ribosomal_RNA__complete	1	3661	0.0273149		alignment-Acetobacteraceae-ref_NR_040998.1__Gluconobacter_thailandicus_strain_F149_1_16S_ribosomal_RNA__partial	493	5352	9.21151		alignment-Proteobacteria-ref_NR_024728.1__Asaia_bogorensis_strain_71_16S_ribosomal_RNA__partial_sequence	1	4735	0.0211193
alignment-Proteobacteria-ref_NR_028953.1__Saccharospirillum_impatiens_strain_EL_105_16S_ribosomal_RNA	1	3661	0.0273149		alignment-Acetobacteraceae-ref_NR_024773.1__Kozakia_baliensis_strain_Yo_3_16S_ribosomal_RNA__partial_sequence	34	5352	0.635277		alignment-Proteobacteria-ref_NR_025013.1__Burkholderia_cenocepacia_strain_LMG_16656_16S_ribosomal_RNA	1	4735	0.0211193
alignment-Proteobacteria-ref_NR_041012.1__Gluconacetobacter_nataicola_strain_LMG_1536_16S_ribosomal_RNA	1	3661	0.0273149							alignment-Proteobacteria-ref_NR_025217.1__Swaminathania_salitolerans_strain_PA_51_16S_ribosomal_RNA__partial	1	4735	0.0211193
alignment-Proteobacteria-ref_NR_041243.1__Azohydromonas_australica_strain_IAM_12664_16S_ribosomal_RNA	1	3661	0.0273149		Gammaproteobacteria, 1					alignment-Proteobacteria-ref_NR_026435.1__Gluconacetobacter_intermedius_strain_TF2_16S_ribosomal_RNA__complete	1	4735	0.0211193
alignment-Proteobacteria-ref_NR_041768.1__Methylibium_petroleiphilum_PM1_strain_PM1_16S_ribosomal_RNA	1	3661	0.0273149		alignment-Gammaproteobacteria-ref_NR_024662.1__Pseudomonas_plecoglossicida_strain_FPC951_16S_ribosomal_RNA	1	5352	0.0186846		alignment-Proteobacteria-ref_NR_040998.1__Gluconobacter_thailandicus_strain_F149_1_16S_ribosomal_RNA__partial	1	4735	0.0211193
										alignment-Proteobacteria-ref_NR_074869.1__Erwinia_tasmaniensis_Et1_99_strain_Et1_99_16S_ribosomal_RNA	1	4735	0.0211193
					Proteobacteria, 1
					alignment-Proteobacteria-ref_NR_024738.1__Asaia_siamensis_strain_S60_1_16S_ribosomal_RNA__partial_sequence	1	5352	0.0186846		Bacteria, 1
					alignment-Proteobacteria-ref_NR_025217.1__Swaminathania_salitolerans_strain_PA_51_16S_ribosomal_RNA__partial	1	5352	0.0186846		alignment-Bacteria-ref_NR_028980.1__Chryseobacterium_daecheongense_strain_CPW406_16S_ribosomal_RNA	1	4735	0.0211193
					alignment-Proteobacteria-ref_NR_026435.1__Gluconacetobacter_intermedius_strain_TF2_16S_ribosomal_RNA__complete	1	5352	0.0186846		alignment-Bacteria-ref_NR_036862.1__Elizabethkingia_miricola_strain_W3_B1_16S_ribosomal_RNA__partial	1	4735	0.0211193
					alignment-Proteobacteria-ref_NR_040998.1__Gluconobacter_thailandicus_strain_F149_1_16S_ribosomal_RNA__partial	1	5352	0.0186846		alignment-Bacteria-ref_NR_074429.1__Riemerella_anatipestifer_ATCC_11845___DSM_15868_strain_DSM_15868	1	4735	0.0211193
					alignment-Proteobacteria-ref_NR_041749.1__Klebsiella_oxytoca_strain_ATCC_13182_16S_ribosomal_RNA__partial	1	5352	0.0186846
					alignment-Proteobacteria-ref_NR_074869.1__Erwinia_tasmaniensis_Et1_99_strain_Et1_99_16S_ribosomal_RNA	1	5352	0.0186846
dsRNA	Figure				dsRNA	Figure				dsRNA	Figure
lacZ	4B				FN3D2	4B				FN3D3	4B
Node	Reads	Total Reads	% prevalence		Node	Reads	Total Reads	% prevalence		Node	Reads	Total Reads	% prevalence
Enterobacteriaceae, 1405	1405	3182	44.1546		Enterobacteriaceae, 4039	4039	4860	83.107		Enterobacteriaceae, 2782	2782	3987	69.7768
Acetobacteraceae, 1335	1335	3182	41.9547		Flavobacteriaceae, 478	478	4860	9.83539		Acetobacteraceae, 1201	1201	3987	30.1229
Flavobacteriaceae, 234	234	3182	7.35387		Acetobacteraceae, 296	296	4860	6.09053		Proteobacteria, 3	3	3987	0.0752445
Leucobacter, 109	109	3182	3.42552		Elizabethkingia, 46	46	4860	0.946502		Bacteria, 1	1	3987	0.0250815
Microbacteriaceae, 64	64	3182	2.01131		Proteobacteria, 1	1	4860	0.0205761
Elizabethkingia, 19	19	3182	0.597109							Reference sequence	Reads	Total Reads	% prevalence
Micrococcineae, 6	6	3182	0.188561		Reference sequence	Reads	Total Reads	% prevalence		Enterobacteriaceae, 2782
Bacteria, 5	5	3182	0.157134		Enterobacteriaceae, 4039					alignment-Enterobacteriaceae-ref_NR_044385.1__Serratia_nematodiphila_strain_DZ0503SBS1_16S_ribosomal_RNA__partial	2777	3987	69.6514
Proteobacteria, 3	3	3182	0.0942803		alignment-Enterobacteriaceae-ref_NR_036886.1__Serratia_marcescens_subsp._sakuensis_strain_KRED_16S_ribosomal	4011	4860	82.5309		alignment-Enterobacteriaceae-ref_NR_074729.1__Klebsiella_variicola_At_22_strain_At_22_16S_ribosomal_RNA__complete	2591	3987	64.9862
Actinomycetales, 2	2	3182	0.0628536		alignment-Enterobacteriaceae-ref_NR_074729.1__Klebsiella_variicola_At_22_strain_At_22_16S_ribosomal_RNA__complete	3681	4860	75.7407		alignment-Enterobacteriaceae-ref_NR_074777.1__Enterobacter_sp._638_strain_638_16S_ribosomal_RNA__complete_sequence	2447	3987	61.3745
					alignment-Enterobacteriaceae-ref_NR_074777.1__Enterobacter_sp._638_strain_638_16S_ribosomal_RNA__complete_sequence	3419	4860	70.3498		alignment-Enterobacteriaceae-ref_NR_028688.1__Citrobacter_murliniae_strain_CDC_2970_59_16S_ribosomal_RNA__partial	2299	3987	57.6624
Reference sequence	Reads	Total Reads	% prevalence		alignment-Enterobacteriaceae-ref_NR_028688.1__Citrobacter_murliniae_strain_CDC_2970_59_16S_ribosomal_RNA__partial	3344	4860	68.8066		alignment-Enterobacteriaceae-ref_NR_041971.1__Pectobacterium_carotovorum_strain_DSM_30168_16S_ribosomal_RNA	909	3987	22.7991
Enterobacteriaceae, 1405					alignment-Enterobacteriaceae-ref_NR_041971.1__Pectobacterium_carotovorum_strain_DSM_30168_16S_ribosomal_RNA	1561	4860	32.1193		alignment-Enterobacteriaceae-ref_NR_024996.1__Raoultella_planticola_strain_ATCC_33531_16S_ribosomal_RNA__partial	417	3987	10.459
alignment-Enterobacteriaceae-ref_NR_074777.1__Enterobacter_sp._638_strain_638_16S_ribosomal_RNA__complete_sequence	1373	3182	43.149		alignment-Enterobacteriaceae-ref_NR_024996.1__Raoultella_planticola_strain_ATCC_33531_16S_ribosomal_RNA__partial	765	4860	15.7407		alignment-Enterobacteriaceae-ref_NR_041923.1__Dickeya_zeae_strain_CFBP_2052_16S_ribosomal_RNA__partial_sequence	373	3987	9.35541
alignment-Enterobacteriaceae-ref_NR_040930.1__Cedecea_neteri_strain_GTC1717_16S_ribosomal_RNA__partial_sequence	1296	3182	40.7291		alignment-Enterobacteriaceae-ref_NR_041923.1__Dickeya_zeae_strain_CFBP_2052_16S_ribosomal_RNA__partial_sequence	635	4860	13.0658		alignment-Enterobacteriaceae-ref_NR_040930.1__Cedecea_neteri_strain_GTC1717_16S_ribosomal_RNA__partial_sequence	11	3987	0.275897
alignment-Enterobacteriaceae-ref_NR_024996.1__Raoultella_planticola_strain_ATCC_33531_16S_ribosomal_RNA__partial	1119	3182	35.1666		alignment-Enterobacteriaceae-ref_NR_040930.1__Cedecea_neteri_strain_GTC1717_16S_ribosomal_RNA__partial_sequence	62	4860	1.27572		alignment-Enterobacteriaceae-ref_NR_041972.1__Erwinia_chrysanthemi_strain_DSM_4610_16S_ribosomal_RNA__partial	11	3987	0.275897
alignment-Enterobacteriaceae-ref_NR_028688.1__Citrobacter_murliniae_strain_CDC_2970_59_16S_ribosomal_RNA__partial	847	3182	26.6185		alignment-Enterobacteriaceae-ref_NR_025331.1__Buttiauxella_izardii_strain_S3_2_161_16S_ribosomal_RNA__partial	14	4860	0.288066
alignment-Enterobacteriaceae-ref_NR_036886.1__Serratia_marcescens_subsp._sakuensis_strain_KRED_16S_ribosomal	780	3182	24.5129							Acetobacteraceae, 1201
alignment-Enterobacteriaceae-ref_NR_074913.1__Klebsiella_pneumoniae_subsp._pneumoniae_MGH_78578_strain_ATCC	626	3182	19.6732		Acetobacteraceae, 296					alignment-Acetobacteraceae-ref_NR_025217.1__Swaminathania_salitolerans_strain_PA_51_16S_ribosomal_RNA__partial	1201	3987	30.1229
alignment-Enterobacteriaceae-ref_NR_025331.1__Buttiauxella_izardii_strain_S3_2_161_16S_ribosomal_RNA__partial	554	3182	17.4104		alignment-Acetobacteraceae-ref_NR_025217.1__Swaminathania_salitolerans_strain_PA_51_16S_ribosomal_RNA__partial	296	4860	6.09053		alignment-Acetobacteraceae-ref_NR_024728.1__Asaia_bogorensis_strain_71_16S_ribosomal_RNA__partial_sequence	1200	3987	30.0978
alignment-Enterobacteriaceae-ref_NR_041971.1__Pectobacterium_carotovorum_strain_DSM_30168_16S_ribosomal_RNA	82	3182	2.577		alignment-Acetobacteraceae-ref_NR_024728.1__Asaia_bogorensis_strain_71_16S_ribosomal_RNA__partial_sequence	295	4860	6.06996		alignment-Acetobacteraceae-ref_NR_074292.1__Gluconacetobacter_diazotrophicus_PAl_5_strain_PAl_5__ATCC_49037	1059	3987	26.5613
alignment-Enterobacteriaceae-ref_NR_028803.1__Kluyvera_cryocrescens_strain_12993_16S_ribosomal_RNA__partial	21	3182	0.659962		alignment-Acetobacteraceae-ref_NR_074292.1__Gluconacetobacter_diazotrophicus_PAl_5_strain_PAl_5__ATCC_49037	253	4860	5.20576		alignment-Acetobacteraceae-ref_NR_040998.1__Gluconobacter_thailandicus_strain_F149_1_16S_ribosomal_RNA__partial	1036	3987	25.9844
alignment-Enterobacteriaceae-ref_NR_041923.1__Dickeya_zeae_strain_CFBP_2052_16S_ribosomal_RNA__partial_sequence	14	3182	0.439975		alignment-Acetobacteraceae-ref_NR_040998.1__Gluconobacter_thailandicus_strain_F149_1_16S_ribosomal_RNA__partial	234	4860	4.81481		alignment-Acetobacteraceae-ref_NR_024773.1__Kozakia_baliensis_strain_Yo_3_16S_ribosomal_RNA__partial_sequence	79	3987	1.98144
alignment-Enterobacteriaceae-ref_NR_074869.1__Erwinia_tasmaniensis_Et1_99_strain_Et1_99_16S_ribosomal_RNA	11	3182	0.345695		alignment-Acetobacteraceae-ref_NR_024773.1__Kozakia_baliensis_strain_Yo_3_16S_ribosomal_RNA__partial_sequence	26	4860	0.534979		alignment-Acetobacteraceae-ref_NR_040832.1__Acetobacter_lovaniensis_strain_NBRC_13753____IFO_13753__16S_ribosomal	25	3987	0.627038
Acetobacteraceae, 1335					Elizabethkingia, 46					Proteobacteria, 3
alignment-Acetobacteraceae-ref_NR_025217.1__Swaminathania_salitolerans_strain_PA_51_16S_ribosomal_RNA__partial	1335	3182	41.9547		alignment-Elizabethkingia-ref_NR_036862.1__Elizabethkingia_miricola_strain_W3_B1_16S_ribosomal_RNA__partial	46	4860	0.946502		alignment-Proteobacteria-ref_NR_029358.1__Burkholderia_multivorans_strain_Struelens_16S_ribosomal_RNA	2	3987	0.050163
alignment-Acetobacteraceae-ref_NR_024810.1__Asaia_krungthepensis_strain_AA08_16S_ribosomal_RNA__partial_sequence	1297	3182	40.7605		alignment-Elizabethkingia-ref_NR_044166.1__Chryseobacterium_bovis_strain_H9_16S_ribosomal_RNA__partial_sequence	46	4860	0.946502		alignment-Proteobacteria-ref_NR_024728.1__Asaia_bogorensis_strain_71_16S_ribosomal_RNA__partial_sequence	1	3987	0.0250815
alignment-Acetobacteraceae-ref_NR_074292.1__Gluconacetobacter_diazotrophicus_PAl_5_strain_PAl_5__ATCC_49037	1224	3182	38.4664		alignment-Elizabethkingia-ref_NR_074432.1__Riemerella_anatipestifer_strain_RA_CH_1_16S_ribosomal_RNA__complete	39	4860	0.802469		alignment-Proteobacteria-ref_NR_025217.1__Swaminathania_salitolerans_strain_PA_51_16S_ribosomal_RNA__partial	1	3987	0.0250815
alignment-Acetobacteraceae-ref_NR_040998.1__Gluconobacter_thailandicus_strain_F149_1_16S_ribosomal_RNA__partial	1219	3182	38.3092							alignment-Proteobacteria-ref_NR_026435.1__Gluconacetobacter_intermedius_strain_TF2_16S_ribosomal_RNA__complete	1	3987	0.0250815
alignment-Acetobacteraceae-ref_NR_024773.1__Kozakia_baliensis_strain_Yo_3_16S_ribosomal_RNA__partial_sequence	31	3182	0.97423		Flavobacteriaceae, 478					alignment-Proteobacteria-ref_NR_036886.1__Serratia_marcescens_subsp._sakuensis_strain_KRED_16S_ribosomal	1	3987	0.0250815
alignment-Acetobacteraceae-ref_NR_040832.1__Acetobacter_lovaniensis_strain_NBRC_13753____IFO_13753__16S_ribosomal	15	3182	0.471402		alignment-Flavobacteriaceae-ref_NR_028980.1__Chryseobacterium_daecheongense_strain_CPW406_16S_ribosomal_RNA	478	4860	9.83539		alignment-Proteobacteria-ref_NR_040998.1__Gluconobacter_thailandicus_strain_F149_1_16S_ribosomal_RNA__partial	1	3987	0.0250815
					alignment-Flavobacteriaceae-ref_NR_042267.1__Elizabethkingia_meningoseptica_strain___ATCC_13253_16S_ribosomal	478	4860	9.83539
Elizabethkingia, 19					alignment-Flavobacteriaceae-ref_NR_044166.1__Chryseobacterium_bovis_strain_H9_16S_ribosomal_RNA__partial_sequence	478	4860	9.83539		Bacteria, 1
alignment-Elizabethkingia-ref_NR_036862.1__Elizabethkingia_miricola_strain_W3_B1_16S_ribosomal_RNA__partial	19	3182	0.597109		alignment-Flavobacteriaceae-ref_NR_074429.1__Riemerella_anatipestifer_ATCC_11845___DSM_15868_strain_DSM_15868	469	4860	9.65021		alignment-Bacteria-ref_NR_024849.1__Corynebacterium_thomssenii_strain_DSM__44276_16S_ribosomal_RNA	1	3987	0.0250815
alignment-Elizabethkingia-ref_NR_044166.1__Chryseobacterium_bovis_strain_H9_16S_ribosomal_RNA__partial_sequence	19	3182	0.597109
alignment-Elizabethkingia-ref_NR_074429.1__Riemerella_anatipestifer_ATCC_11845___DSM_15868_strain_DSM_15868	17	3182	0.534255		Proteobacteria, 1
					alignment-Proteobacteria-ref_NR_029358.1__Burkholderia_multivorans_strain_Struelens_16S_ribosomal_RNA	1	4860	0.0205761
Flavobacteriaceae, 234
alignment-Flavobacteriaceae-ref_NR_028980.1__Chryseobacterium_daecheongense_strain_CPW406_16S_ribosomal_RNA	234	3182	7.35387
alignment-Flavobacteriaceae-ref_NR_042267.1__Elizabethkingia_meningoseptica_strain___ATCC_13253_16S_ribosomal	234	3182	7.35387
alignment-Flavobacteriaceae-ref_NR_074432.1__Riemerella_anatipestifer_strain_RA_CH_1_16S_ribosomal_RNA__complete	234	3182	7.35387
alignment-Flavobacteriaceae-ref_NR_074543.1__Flavobacteriaceae_bacterium_3519_10_strain_3519_10_16S_ribosomal	11	3182	0.345695
Leucobacter, 109
alignment-Leucobacter-ref_NR_024674.1__Leucobacter_albus_strain_IAM_14851_16S_ribosomal_RNA__partial	109	3182	3.42552
alignment-Leucobacter-ref_NR_042315.1__Curtobacterium_pusillum_strain___DSM_20527_16S_ribosomal_RNA	108	3182	3.39409
alignment-Leucobacter-ref_NR_044932.1__Microbacterium_arabinogalactanolyticum_strain_DSM_8611_16S_ribosomal	108	3182	3.39409
alignment-Leucobacter-ref_NR_026190.1__Arthrobacter_nicotianae_strain_DSM_20123_16S_ribosomal_RNA__partial	13	3182	0.408548
Microbacteriaceae, 64
alignment-Microbacteriaceae-ref_NR_024674.1__Leucobacter_albus_strain_IAM_14851_16S_ribosomal_RNA__partial	64	3182	2.01131
alignment-Microbacteriaceae-ref_NR_044932.1__Microbacterium_arabinogalactanolyticum_strain_DSM_8611_16S_ribosomal	64	3182	2.01131
alignment-Microbacteriaceae-ref_NR_042315.1__Curtobacterium_pusillum_strain___DSM_20527_16S_ribosomal_RNA	51	3182	1.60277
alignment-Microbacteriaceae-ref_NR_026190.1__Arthrobacter_nicotianae_strain_DSM_20123_16S_ribosomal_RNA__partial	12	3182	0.377121
Micrococcineae, 6
alignment-Micrococcineae-ref_NR_026190.1__Arthrobacter_nicotianae_strain_DSM_20123_16S_ribosomal_RNA__partial	3	3182	0.0942803
alignment-Micrococcineae-ref_NR_026468.1__Microbacterium_esteraromaticum_strain_DSM_8609_16S_ribosomal	3	3182	0.0942803
alignment-Micrococcineae-ref_NR_042288.1__Leucobacter_aridicollis_strain___L9_16S_ribosomal_RNA__complete	3	3182	0.0942803
alignment-Micrococcineae-ref_NR_075062.1__Micrococcus_luteus_NCTC_2665_strain_NCTC_2665_16S_ribosomal_RNA	3	3182	0.0942803
alignment-Micrococcineae-ref_NR_025467.1__Curtobacterium_flaccumfaciens_pv._flaccumfaciens_strain_LMG_3645	1	3182	0.0314268
alignment-Micrococcineae-ref_NR_026159.1__Rathayibacter_rathayi_strain_DSM_7485_16S_ribosomal_RNA__partial	1	3182	0.0314268
Actinomycetales, 2
alignment-Actinomycetales-ref_NR_026449.1__Corynebacterium_confusum_strain_DMMZ_2439_16S_ribosomal_RNA	2	3182	0.0628536
alignment-Actinomycetales-ref_NR_025165.1__Gordonia_namibiensis_strain_NAM_BN063A_16S_ribosomal_RNA__partial	1	3182	0.0314268
alignment-Actinomycetales-ref_NR_043238.1__Mycobacterium_aubagnense_strain_CIP_108543_16S_ribosomal_RNA	1	3182	0.0314268
Proteobacteria, 3
alignment-Proteobacteria-ref_NR_029358.1__Burkholderia_multivorans_strain_Struelens_16S_ribosomal_RNA	2	3182	0.0628536
alignment-Proteobacteria-ref_NR_024728.1__Asaia_bogorensis_strain_71_16S_ribosomal_RNA__partial_sequence	1	3182	0.0314268
alignment-Proteobacteria-ref_NR_025217.1__Swaminathania_salitolerans_strain_PA_51_16S_ribosomal_RNA__partial	1	3182	0.0314268
alignment-Proteobacteria-ref_NR_036886.1__Serratia_marcescens_subsp._sakuensis_strain_KRED_16S_ribosomal	1	3182	0.0314268
Bacteria, 5
alignment-Bacteria-ref_NR_036862.1__Elizabethkingia_miricola_strain_W3_B1_16S_ribosomal_RNA__partial	5	3182	0.157134
alignment-Bacteria-ref_NR_074722.1__Enterobacter_asburiae_LF7a_strain_LF7a_16S_ribosomal_RNA__complete	5	3182	0.157134
alignment-Bacteria-ref_NR_024996.1__Raoultella_planticola_strain_ATCC_33531_16S_ribosomal_RNA__partial	4	3182	0.125707
alignment-Bacteria-ref_NR_025243.1__Cedecea_davisae_strain_DSM_4568_16S_ribosomal_RNA__partial_sequence	4	3182	0.125707
alignment-Bacteria-ref_NR_028803.1__Kluyvera_cryocrescens_strain_12993_16S_ribosomal_RNA__partial	4	3182	0.125707
alignment-Bacteria-ref_NR_042647.1__Chryseobacterium_gregarium_strain___DSM_19109___LMG_24052___P	4	3182	0.125707
alignment-Bacteria-ref_NR_025328.1__Buttiauxella_brennerae_strain_S1_6_571_16S_ribosomal_RNA__partial	1	3182	0.0314268
dsRNA	Figure				dsRNA	Figure
lacZ	4C				FN3D3	4C
					Node	Reads	Total Reads	% prevalence
Node	Reads	Total Reads	% prevalence		Enterobacteriaceae, 3349	3349	5074	66.0032
Acetobacteraceae, 1800	1800	3518	51.1654		Acetobacteraceae, 926	926	5074	18.2499
Enterobacteriaceae, 1670	1670	3518	47.4702		Burkholderia cepacia complex, 647	647	5074	12.7513
Burkholderia cepacia complex, 19	19	3518	0.54008		Burkholderia, 121	121	5074	2.38471
Mycobacterium, 15	15	3518	0.426379		Aeromonas, 25	25	5074	0.492708
Burkholderia, 6	6	3518	0.170551		Proteobacteria, 3	3	5074	0.059125
Bacteria, 4	4	3518	0.113701		Gammaproteobacteria, 2	2	5074	0.0394166
Proteobacteria, 3	3	3518	0.0852757		Bacteria, 1	1	5074	0.0197083
Actinomycetales, 1	1	3518	0.0284252
					Reference sequence	Reads	Total Reads	% prevalence
Reference sequence	Reads	Total Reads	% prevalence		Enterobacteriaceae, 3349
Enterobacteriaceae, 1670					alignment-Enterobacteriaceae-ref_NR_074777.1__Enterobacter_sp._638_strain_638_16S_ribosomal_RNA__complete_sequence	3185	5074	62.771
alignment-Enterobacteriaceae-ref_NR_074722.1__Enterobacter_asburiae_LF7a_strain_LF7a_16S_ribosomal_RNA__complete	955	3518	27.1461		alignment-Enterobacteriaceae-ref_NR_040930.1__Cedecea_neteri_strain_GTC1717_16S_ribosomal_RNA__partial_sequence	2525	5074	49.7635
alignment-Enterobacteriaceae-ref_NR_074892.1__Shigella_dysenteriae_Sd197_strain_Sd197_16S_ribosomal_RNA__complete	750	3518	21.3189		alignment-Enterobacteriaceae-ref_NR_024996.1__Raoultella_planticola_strain_ATCC_33531_16S_ribosomal_RNA__partial	2521	5074	49.6847
alignment-Enterobacteriaceae-ref_NR_040930.1__Cedecea_neteri_strain_GTC1717_16S_ribosomal_RNA__partial_sequence	712	3518	20.2388		alignment-Enterobacteriaceae-ref_NR_044385.1__Serratia_nematodiphila_strain_DZ0503SBS1_16S_ribosomal_RNA__partial	1708	5074	33.6618
alignment-Enterobacteriaceae-ref_NR_024996.1__Raoultella_planticola_strain_ATCC_33531_16S_ribosomal_RNA__partial	675	3518	19.187		alignment-Enterobacteriaceae-ref_NR_028688.1__Citrobacter_murliniae_strain_CDC_2970_59_16S_ribosomal_RNA__partial	1472	5074	29.0106
alignment-Enterobacteriaceae-ref_NR_074902.1__Escherichia_fergusonii_ATCC_35469_strain_ATCC_35469_16S_ribosomal	644	3518	18.3059		alignment-Enterobacteriaceae-ref_NR_025331.1__Buttiauxella_izardii_strain_S3_2_161_16S_ribosomal_RNA__partial	1324	5074	26.0938
alignment-Enterobacteriaceae-ref_NR_028688.1__Citrobacter_murliniae_strain_CDC_2970_59_16S_ribosomal_RNA__partial	555	3518	15.776		alignment-Enterobacteriaceae-ref_NR_074913.1__Klebsiella_pneumoniae_subsp._pneumoniae_MGH_78578_strain_ATCC	1184	5074	23.3346
alignment-Enterobacteriaceae-ref_NR_041699.1__Salmonella_bongori_strain_BR_1859_16S_ribosomal_RNA__partial	516	3518	14.6674		alignment-Enterobacteriaceae-ref_NR_041971.1__Pectobacterium_carotovorum_strain_DSM_30168_16S_ribosomal_RNA	375	5074	7.39062
alignment-Enterobacteriaceae-ref_NR_074913.1__Klebsiella_pneumoniae_subsp._pneumoniae_MGH_78578_strain_ATCC	469	3518	13.3314		alignment-Enterobacteriaceae-ref_NR_028803.1__Kluyvera_cryocrescens_strain_12993_16S_ribosomal_RNA__partial	50	5074	0.985416
alignment-Enterobacteriaceae-ref_NR_044385.1__Serratia_nematodiphila_strain_DZ0503SBS1_16S_ribosomal_RNA__partial	333	3518	9.46561		alignment-Enterobacteriaceae-ref_NR_044729.1__Hafnia_alvei_16S_ribosomal_RNA__complete_sequence	20	5074	0.394166
alignment-Enterobacteriaceae-ref_NR_025331.1__Buttiauxella_izardii_strain_S3_2_161_16S_ribosomal_RNA__partial	310	3518	8.81182
alignment-Enterobacteriaceae-ref_NR_074869.1__Erwinia_tasmaniensis_Et1_99_strain_Et1_99_16S_ribosomal_RNA	50	3518	1.42126		Aeromonas, 25
alignment-Enterobacteriaceae-ref_NR_074764.1__Pectobacterium_wasabiae_WPP163_strain_WPP163_16S_ribosomal_RNA	47	3518	1.33599		alignment-Aeromonas-ref_NR_036911.2__Aeromonas_media_strain_RM_16S_ribosomal_RNA__partial_sequence	25	5074	0.492708
alignment-Enterobacteriaceae-ref_NR_028803.1__Kluyvera_cryocrescens_strain_12993_16S_ribosomal_RNA__partial	15	3518	0.426379
					Burkholderia cepacia complex, 647
Burkholderia cepacia complex, 19					alignment-Burkholderia_cepacia_complex-ref_NR_029358.1__Burkholderia_multivorans_strain_Struelens_16S_ribosomal_RNA	647	5074	12.7513
alignment-Burkholderia_cepacia_complex-ref_NR_029358.1__Burkholderia_multivorans_strain_Struelens_16S_ribosomal_RNA	19	3518	0.54008
					Burkholderia, 121
Burkholderia, 6					alignment-Burkholderia-ref_NR_042633.1__Burkholderia_diffusa_R_15930_16S_ribosomal_RNA__partial_sequence	121	5074	2.38471
alignment-Burkholderia-ref_NR_041719.1__Burkholderia_cepacia_strain_LMG_14294_16S_ribosomal_RNA__partial	6	3518	0.170551
					Acetobacteraceae, 926
Acetobacteraceae, 1800					alignment-Acetobacteraceae-ref_NR_025217.1__Swaminathania_salitolerans_strain_PA_51_16S_ribosomal_RNA__partial	925	5074	18.2302
alignment-Acetobacteraceae-ref_NR_025217.1__Swaminathania_salitolerans_strain_PA_51_16S_ribosomal_RNA__partial	1798	3518	51.1086		alignment-Acetobacteraceae-ref_NR_024728.1__Asaia_bogorensis_strain_71_16S_ribosomal_RNA__partial_sequence	924	5074	18.2105
alignment-Acetobacteraceae-ref_NR_024728.1__Asaia_bogorensis_strain_71_16S_ribosomal_RNA__partial_sequence	1778	3518	50.5401		alignment-Acetobacteraceae-ref_NR_074292.1__Gluconacetobacter_diazotrophicus_PAl_5_strain_PAl_5__ATCC_49037	811	5074	15.9834
alignment-Acetobacteraceae-ref_NR_074292.1__Gluconacetobacter_diazotrophicus_PAl_5_strain_PAl_5__ATCC_49037	1670	3518	47.4702		alignment-Acetobacteraceae-ref_NR_040998.1__Gluconobacter_thailandicus_strain_F149_1_16S_ribosomal_RNA__partial	804	5074	15.8455
alignment-Acetobacteraceae-ref_NR_040998.1__Gluconobacter_thailandicus_strain_F149_1_16S_ribosomal_RNA__partial	1643	3518	46.7027		alignment-Acetobacteraceae-ref_NR_024773.1__Kozakia_baliensis_strain_Yo_3_16S_ribosomal_RNA__partial_sequence	51	5074	1.00512
alignment-Acetobacteraceae-ref_NR_040832.1__Acetobacter_lovaniensis_strain_NBRC_13753____IFO_13753__16S_ribosomal	64	3518	1.81922		alignment-Acetobacteraceae-ref_NR_040832.1__Acetobacter_lovaniensis_strain_NBRC_13753____IFO_13753__16S_ribosomal	21	5074	0.413875
alignment-Acetobacteraceae-ref_NR_024773.1__Kozakia_baliensis_strain_Yo_3_16S_ribosomal_RNA__partial_sequence	33	3518	0.938033
alignment-Acetobacteraceae-ref_NR_041601.1__Tanticharoenia_sakaeratensis_strain_NBRC_103193_16S_ribosomal	15	3518	0.426379		Gammaproteobacteria, 2
					alignment-Gammaproteobacteria-ref_NR_024643.1__Enterobacter_aerogenes_strain_JCM1235_16S_ribosomal_RNA__partial	1	5074	0.0197083
Mycobacterium, 15					alignment-Gammaproteobacteria-ref_NR_024996.1__Raoultella_planticola_strain_ATCC_33531_16S_ribosomal_RNA__partial	1	5074	0.0197083
alignment-Mycobacterium-ref_NR_043588.1__Mycobacterium_arupense_strain_AR30097_16S_ribosomal_RNA__partial	14	3518	0.397953		alignment-Gammaproteobacteria-ref_NR_025195.1__Shewanella_fidelis_strain_KMM_3582_16S_ribosomal_RNA__partial	1	5074	0.0197083
					alignment-Gammaproteobacteria-ref_NR_025432.1__Oleiphilus_messinensis_strain_ME102_16S_ribosomal_RNA__partial	1	5074	0.0197083
					alignment-Gammaproteobacteria-ref_NR_026058.1__Shewanella_gelidimarina_strain_ACAM_456_16S_ribosomal_RNA__partial	1	5074	0.0197083
Actinomycetales, 1					alignment-Gammaproteobacteria-ref_NR_028677.1__Kluyvera_ascorbata_strain_ATCC_33433_16S_ribosomal_RNA__partial	1	5074	0.0197083
alignment-Actinomycetales-ref_NR_025310.1__Rothia_nasimurium_strain_CCUG_35957_16S_ribosomal_RNA__partial	1	3518	0.0284252		alignment-Gammaproteobacteria-ref_NR_041699.1__Salmonella_bongori_strain_BR_1859_16S_ribosomal_RNA__partial	1	5074	0.0197083
alignment-Actinomycetales-ref_NR_028924.1__Kocuria_polaris_strain_CMS_76or_16S_ribosomal_RNA__partial_sequence	1	3518	0.0284252		alignment-Gammaproteobacteria-ref_NR_042155.1__Aeromonas_hydrophila_subsp._dhakensis_strain___LMG_19562_16S	1	5074	0.0197083
alignment-Actinomycetales-ref_NR_029119.1__Nesterenkonia_sandarakina_strain_YIM_70009_16S_ribosomal_RNA	1	3518	0.0284252
alignment-Actinomycetales-ref_NR_044894.1__Arthrobacter_woluwensis_strain_1551_16S_ribosomal_RNA__complete	1	3518	0.0284252		Proteobacteria, 3
alignment-Actinomycetales-ref_NR_074770.1__Arthrobacter_phenanthrenivorans_Sphe3_strain_Sphe3_16S_ribosomal	1	3518	0.0284252		alignment-Proteobacteria-ref_NR_024728.1__Asaia_bogorensis_strain_71_16S_ribosomal_RNA__partial_sequence	2	5074	0.0394166
alignment-Actinomycetales-ref_NR_075062.1__Micrococcus_luteus_NCTC_2665_strain_NCTC_2665_16S_ribosomal_RNA	1	3518	0.0284252		alignment-Proteobacteria-ref_NR_025217.1__Swaminathania_salitolerans_strain_PA_51_16S_ribosomal_RNA__partial	2	5074	0.0394166
					alignment-Proteobacteria-ref_NR_025338.1__Serratia_entomophila_strain_DSM_12358_16S_ribosomal_RNA__partial	1	5074	0.0197083
Proteobacteria, 3					alignment-Proteobacteria-ref_NR_027221.1__Lysobacter_antibioticus_strain_USAM_3C_16S_ribosomal_RNA__partial	1	5074	0.0197083
alignment-Proteobacteria-ref_NR_024728.1__Asaia_bogorensis_strain_71_16S_ribosomal_RNA__partial_sequence	2	3518	0.0568505		alignment-Proteobacteria-ref_NR_028688.1__Citrobacter_murliniae_strain_CDC_2970_59_16S_ribosomal_RNA__partial	1	5074	0.0197083
alignment-Proteobacteria-ref_NR_024861.1__Citrobacter_farmeri_strain_CDC_2991_81_16S_ribosomal_RNA__partial	2	3518	0.0568505		alignment-Proteobacteria-ref_NR_040998.1__Gluconobacter_thailandicus_strain_F149_1_16S_ribosomal_RNA__partial	1	5074	0.0197083
alignment-Proteobacteria-ref_NR_025217.1__Swaminathania_salitolerans_strain_PA_51_16S_ribosomal_RNA__partial	2	3518	0.0568505		alignment-Proteobacteria-ref_NR_041719.1__Burkholderia_cepacia_strain_LMG_14294_16S_ribosomal_RNA__partial	1	5074	0.0197083
alignment-Proteobacteria-ref_NR_041699.1__Salmonella_bongori_strain_BR_1859_16S_ribosomal_RNA__partial	2	3518	0.0568505		alignment-Proteobacteria-ref_NR_044467.1__Rhodanobacter_ginsenosidimutans_strain_CSC17Ta_90_16S_ribosomal	1	5074	0.0197083
alignment-Proteobacteria-ref_NR_036794.1__Klebsiella_pneumoniae_strain_DSM_30104_16S_ribosomal_RNA__complete	1	3518	0.0284252		alignment-Proteobacteria-ref_NR_074764.1__Pectobacterium_wasabiae_WPP163_strain_WPP163_16S_ribosomal_RNA	1	5074	0.0197083
alignment-Proteobacteria-ref_NR_074869.1__Erwinia_tasmaniensis_Et1_99_strain_Et1_99_16S_ribosomal_RNA	1	3518	0.0284252		alignment-Proteobacteria-ref_NR_074777.1__Enterobacter_sp._638_strain_638_16S_ribosomal_RNA__complete_sequence	1	5074	0.0197083
alignment-Proteobacteria-ref_NR_043634.1__Xenorhabdus_stockiae_strain_TH01_16S_ribosomal_RNA__partial_sequence	1	3518	0.0284252		alignment-Proteobacteria-ref_NR_074869.1__Erwinia_tasmaniensis_Et1_99_strain_Et1_99_16S_ribosomal_RNA	1	5074	0.0197083
alignment-Proteobacteria-ref_NR_074722.1__Enterobacter_asburiae_LF7a_strain_LF7a_16S_ribosomal_RNA__complete	1	3518	0.0284252
alignment-Proteobacteria-ref_NR_074764.1__Pectobacterium_wasabiae_WPP163_strain_WPP163_16S_ribosomal_RNA	1	3518	0.0284252		Bacteria, 1
alignment-Proteobacteria-ref_NR_074898.1__Proteus_mirabilis_HI4320_strain_HI4320_16S_ribosomal_RNA__complete	1	3518	0.0284252		alignment-Bacteria-ref_NR_026025.1__Riemerella_anatipestifer_strain_ATCC_11845_16S_ribosomal_RNA	1	5074	0.0197083
					alignment-Bacteria-ref_NR_028980.1__Chryseobacterium_daecheongense_strain_CPW406_16S_ribosomal_RNA	1	5074	0.0197083
Bacteria, 4					alignment-Bacteria-ref_NR_036862.1__Elizabethkingia_miricola_strain_W3_B1_16S_ribosomal_RNA__partial	1	5074	0.0197083
alignment-Bacteria-ref_NR_028664.1__Streptococcus_mitis_strain_NS51_16S_ribosomal_RNA__complete_sequence	4	3518	0.113701
alignment-Bacteria-ref_NR_024728.1__Asaia_bogorensis_strain_71_16S_ribosomal_RNA__partial_sequence	1	3518	0.0284252
alignment-Bacteria-ref_NR_025217.1__Swaminathania_salitolerans_strain_PA_51_16S_ribosomal_RNA__partial	1	3518	0.0284252
alignment-Bacteria-ref_NR_026435.1__Gluconacetobacter_intermedius_strain_TF2_16S_ribosomal_RNA__complete	1	3518	0.0284252
