# Supplementary material for: Genetic Dissection of Anopheles gambiae Gut Epithelial Responses to Serratia marcescens
Source: PLoS Pathog. 2014 Mar 6;10(3):e1003897. doi: 10.1371/journal.ppat.1003897 (PMC3946313; doi:10.1371/journal.ppat.1003897)
Supplement: Table S7 — An. gambiae transcripts with more than 1.75-fold regulation following S. marcescens infection. 99 An. gambiae transcripts showing more than 1.75-fold up or down regulation following S. marcescens infection. For each transcript, the Transcript ID is shown along with its designated name or functional description, the assigned functional class, the fold-change regulation and the p-values obtained by a t-test against zero using the log2-transformed values for each interrogated probe. (XLSX) [file ppat.1003897.s013.xlsx]

## Sheet: Sheet1
Transcript ID	Name/Description	Functional class (Figure 4B)	Fold change	Regulation	Infection 1 probe 1	Infection 1 probe 2	Infection 2 probe 1	Infection 2 probe 2	Infection 3 probe 1	Infection 3 probe 2	t-test P-value	Significant
AGAP005625-RB	SCRASP1	Chitin-binding	1.7633	up	0.804788	0.547294	1.07927	1.9614	-0.0858111	0.244423	0.0363	Yes
AGAP006991-RA	Chitin-binding	Chitin-binding	2.76526	up	3.48587	3.32342	0.398366	0.260119	1.47583	0	0.0671	No
AGAP006433-RA	AgAper34	Chitin-binding	1.82695	down	-1.87795	-2.02838	-0.0647287	-0.125043	-1.2422	0	0.069	No
AGAP001203-RA	Chitin-binding	Chitin-binding	2.05499	down	-1.16309	-1.22812	-1.9226	-1.91592	0	0	0.0325	Yes
AGAP006434-RA	AgAper57	Chitin-binding	2.36293	down	-3.11861	-3.18852	-0.222932	-0.316699	-0.491263	0	0.103	No
AGAP002471-RA	ADP ribosylation factor	GPCR signaling	2.2051	up	1.29891	0.964282	0.849446	0.378932	1.28747	1.5646	0.0016	Yes
AGAP002635-RB	Gr13 Gustatory receptor	GPCR signaling	2.1275	down	-2.15388	-1.94695	-1.6781	-1.29293	-0.152708	0.445682	0.0122	Yes
AGAP002635-RA	Gr13 Gustatory receptor	GPCR signaling	2.68459	down	-2.2119	-2.07152	-1.45962	-1.78454	-0.859329	0	0.0095	Yes
AGAP011046-RA	Deoxyribonuclease I	Hydrolase	1.75406	up	1.12375	1.96176	0.439293	0.372697	1.16359	0	0.0336	Yes
AGAP006426-RA	Glycoside hydrolase	Hydrolase	1.86105	up	0.277414	7.77e-05	2.19539	2.69895	0.0320754	0	0.1469	No
AGAP005381-RC	Beta-hexosaminidase	Hydrolase	1.9356	up	0.236204	0.424205	0.671749	0.646496	0.352427	2.70426	0.0779	No
AGAP011698-RA	Deoxyribonuclease I	Hydrolase	2.23408	down	-2.25989	-1.81112	-1.92754	-1.63273	0.81815	0	0.0094	Yes
AGAP006187-RA	Insect allergen G12	Insect allergen	2.27495	up	1.26681	1.53336	2.11794	2.20995	0	0	0.0318	Yes
AGAP012703-RA	takeout2 (TO2)	Juvenile hormone/pheromone binding	1.78033	up	0.278257	0.383197	0.701065	0.499845	0.972243	1.47583	0.0108	Yes
AGAP008052-RA	Insect pheromone-binding protein	Juvenile hormone/pheromone binding	1.77062	down	-1.48743	-1.33226	-1.80682	-1.94739	0.404274	0.909617	0.0025	Yes
AGAP008182-RA	Juvenile hormone-binding	Juvenile hormone/pheromone binding	2.05633	down	-0.943658	-0.973161	-2.29573	-2.10203	0.0086329	0	0.0472	Yes
AGAP007343-RA	LYSC2	Lysozyme	3.43999	up	1.80034	1.70751	3.52453	3.69149	0	0	0.0422	Yes
AGAP001956-RA	ML28	MD-2 lipid recognition	2.36136	down	-1.16843	-1.10418	-1.56346	-1.57928	-1.54937	-0.517436	0.0007	Yes
AGAP002804-RA	ML4	MD-2 lipid recognition	2.54588	down	-2.05613	-2.62971	-1.23237	-1.70068	-0.085783	0	0.0317	Yes
AGAP004642-RA	Neuropeptide F (NPF)	Neuropeptide signaling	1.77004	down	-0.517364	-0.231709	-0.91938	-0.961658	-1.85681	-0.498055	0.0164	Yes
AGAP008898-RA	Mitochondrial ATPase inhibitor	Nucleotide metabolic process	1.80931	down	-0.119185	0.170012	-2.66973	-2.71243	0.443653	0	0.1136	No
AGAP012891-RA	Heat shock protein 70	Nucleotide metabolic process	2.0221	down	-0.0814376	0.0999994	-3.01071	-3.2566	-1.18185	0.613044	0.0644	No
AGAP007790-RA	Sodium/potassium-dependent ATPase	Nucleotide metabolic process	2.08658	down	-0.608312	-0.807011	-0.18705	-0.0832205	-4.33961	-0.517436	0.1589	No
AGAP004583-RA	Heat shock protein 70	Nucleotide metabolic process	2.4347	down	-0.363325	-0.0724101	-3.80371	-3.41644	0.187181	0	0.1341	No
AGAP004582-RA	Heat shock protein 70	Nucleotide metabolic process	2.43603	down	-0.476568	-0.296424	-3.59673	-3.33061	0	0	0.1238	No
AGAP004581-RA	Heat shock protein 70	Nucleotide metabolic process	2.47071	down	-0.15756	-0.125679	-3.81199	-3.71436	0	0	0.1556	No
AGAP006080-RA	OBP54	Odorant binding	2.3837	down	-2.32749	-1.81975	-1.33773	-1.15891	-0.938778	0	0.0115	Yes
AGAP002905-RA	OBP13	Odorant binding	5.99613	down	-3.69675	-3.41969	-4.83573	-3.56104	0	0	0.0279	Yes
AGAP000946-RA	Sterol desaturase	Oxidoreductase	2.00439	up	0.804788	0.832189	0.970023	1.68764	2.02294	0	0.0156	Yes
AGAP003581-RA	Alcohol dehydrogenase	Oxidoreductase	2.04808	up	1.13983	1.25213	1.17863	1.12543	0.723246	0.795033	0.0001	Yes
AGAP008210-RA	Cytochrome P450 CYP6N1	Oxidoreductase	2.11371	up	2.1779	2.42443	1.3034	0.987962	-0.286468	0	0.0302	Yes
AGAP002865-RA	Cytochrome P450 CYP6P3	Oxidoreductase	2.68953	up	2.16416	2.20088	2.10082	2.11623	0	0	0.0251	Yes
AGAP005501-RA	Oxidoreductase	Oxidoreductase	2.808	up	1.38043	1.53915	2.79667	2.85342	0.49714	0	0.0246	Yes
AGAP007621-RC	Cytochrome-c oxidase	Oxidoreductase	2.18985	down	0.0785322	0.339155	-0.60918	-0.484536	-6.18238	0.0086329	0.2489	No
AGAP003209-RA	Sterol desaturase	Oxidoreductase	2.42644	down	-2.3915	-2.4089	-0.307837	-0.218905	-1.22584	0	0.0587	No
AGAP011654-RA	Microsomal dipeptidase	Peptidase other	1.99762	up	1.15257	1.10504	1.79902	1.8688	0.0086329	0	0.0325	Yes
AGAP011442-RA	Serine carboxypeptidase	Peptidase other	1.87298	down	-1.84648	-1.705	-0.968261	-0.82025	0.174486	0	0.0315	Yes
AGAP005203-RA	PGRPLC	Protein/receptor binding	1.75333	up	0.829331	0.899533	0.819525	0.961788	-0.296552	0.98946	0.0006	Yes
AGAP001350-RA	Immunoglobulin-like	Protein/receptor binding	1.77594	up	1.40418	0.394358	1.41629	0.45033	0.0320754	1.09827	0.0204	Yes
AGAP011228-RA	FREP24	Protein/receptor binding	1.86806	up	1.35503	0.543943	1.74636	1.79759	0	0	0.0446	Yes
AGAP006348-RA	LRIM1	Protein/receptor binding	1.88442	up	1.45796	0.479216	2.21423	2.01962	-0.381807	0	0.0348	Yes
AGAP011765-RA	F-spondin	Protein/receptor binding	1.9039	up	1.61349	0.558243	2.26012	0.684662	0.622504	0	0.036	Yes
AGAP000668-RA	Zinc finger	Protein/receptor binding	2.03283	up	1.45796	-0.110081	2.72427	0.502587	-0.168081	1.13548	0.054	No
AGAP005848-RA	FREP44	Protein/receptor binding	2.32765	up	0.170492	0.247759	1.95295	2.01634	0.0791383	1.95804	0.0459	Yes
AGAP011482-RA	Serine proteinase inhibitor	Protein/receptor binding	2.51848	up	2.43127	2.23519	1.6409	1.75481	0.147519	0	0.0239	Yes
AGAP006689-RA	Protein binding BTB/POZ-like	Protein/receptor binding	1.83233	down	-0.458111	-0.558188	-1.69407	-1.77128	-0.531676	0	0.0368	Yes
AGAP010762-RA	FREP4	Protein/receptor binding	1.86309	down	-1.89024	-1.56616	-1.381	-1.02812	0.67676	0	0.0111	Yes
AGAP010760-RA	FREP69	Protein/receptor binding	2.04109	down	-1.78425	-2.02799	-1.26326	-1.1057	0	0	0.0332	Yes
AGAP006367-RA	Zinc finger	Protein/receptor binding	2.15632	down	-0.478766	-0.657937	-1.92806	-2.08582	-1.24241	0	0.0258	Yes
AGAP003025-RC	60S acidic ribosomal protein LP2	Ribosome	1.79742	down	0.0224934	0.0286913	-1.61291	-1.68425	-1.90356	0.0086329	0.0719	No
AGAP012037-RA	CLIPB20	Serine-type endopeptidase	1.75335	up	0.547294	0.429533	1.7307	1.84523	0.572776	0	0.0389	Yes
AGAP007142-RA	Serine-type endopeptidase	Serine-type endopeptidase	1.77752	up	1.63431	1.47303	-0.294476	-0.232794	0.821053	0.937953	0.0127	Yes
AGAP004316-RA	Serine-type endopeptidase Disulphide knot CLIP	Serine-type endopeptidase	1.84705	up	0.604455	0.577406	2.04364	2.11429	0	0	0.072	No
AGAP001648-RA	CLIPB17	Serine-type endopeptidase	1.8602	up	0.477264	0.571696	2.25985	2.16353	0.164495	0	0.0711	No
AGAP011785-RA	CLIPE6	Serine-type endopeptidase	1.90383	up	1.34592	0.96376	0.849446	0.117198	0.60601	1.14696	0.0052	Yes
AGAP005669-RA	Serine collagenase	Serine-type endopeptidase	1.94206	up	0.328194	0.547294	2.19539	2.82201	0.363214	0	0.0801	No
AGAP012966-RA	Serine-type endopeptidase	Serine-type endopeptidase	1.95535	up	0.887085	0.807131	2.03545	2.07417	0	0	0.0504	No
AGAP006707-RA	Serine-type endopeptidase	Serine-type endopeptidase	2.10124	up	3.27815	3.45517	-0.322748	-0.393711	0.507319	0	0.0966	No
AGAP011325-RA	Coagulation factor	Serine-type endopeptidase	2.20451	up	0	2.86e-06	3.2096	3.19082	0.694404	0	0.1274	No
AGAP005689-RA	Serine collagenase	Serine-type endopeptidase	2.49037	up	0.726437	0.726437	3.2459	3.0572	0.377427	0	0.0663	No
AGAP013221-RA	Trypsin putative	Serine-type endopeptidase	2.59307	up	0.807804	1.00849	3.27876	3.52716	-0.956174	0.193277	0.0364	Yes
AGAP010833-RA	CLIPB14	Serine-type endopeptidase	2.75905	up	1.14472	1.21865	2.79915	2.79103	0.0086329	0.933574	0.0218	Yes
AGAP005690-RA	Serine collagenase	Serine-type endopeptidase	2.78918	up	0.96376	0.726437	3.42684	3.51015	0.719975	0	0.0533	No
AGAP008291-RA	Trypsin-5	Serine-type endopeptidase	1.81801	down	-2.37695	-2.5115	-0.424676	-0.478717	0.882573	0	0.0514	No
AGAP001198-RA	Trypsin putative	Serine-type endopeptidase	2.11932	down	-2.64256	-2.63025	0.168227	0.18197	-1.61887	0	0.0647	No
AGAP008290-RA	Trypsin-6	Serine-type endopeptidase	2.42049	down	-2.79501	-2.6207	-0.6201	-0.581441	-0.767158	0	0.0503	No
AGAP004344-RA	Hairless - Transcription corepressor activity	Transcription	1.88463	down	-0.50395	-0.522533	-1.19536	-0.858067	-2.38798	0	0.0427	Yes
AGAP005041-RA	Homeobox	Transcription	2.044	down	-1.46696	-1.22461	-1.85259	-1.6393	0	0	0.028	Yes
AGAP004382-RA	Glutathione S-transferase delta class GSTD3	Transferase	1.81048	up	1.10703	1.13365	0.785316	0.770123	1.63112	0	0.0095	Yes
AGAP003759-RA	CHK kinase-like Juvenile hormone-inducible	Transferase	1.81153	up	1.57954	1.45822	1.13975	1.18206	0.0718365	0	0.0241	Yes
AGAP003490-RA	Serine-pyruvate aminotransferase	Transferase	1.82204	up	1.07797	1.1232	0.983009	0.85807	-0.229379	0.716735	0.0016	Yes
AGAP003220-RA	CHK kinase-like Juvenile hormone-inducible	Transferase	1.9423	up	1.29891	0.884064	1.35654	1.35654	-0.0044837	0.268496	0.0164	Yes
AGAP003762-RA	CHK kinase-like Juvenile hormone-inducible	Transferase	2.03936	up	0.552176	0.778607	1.5739	1.78439	0.0320754	1.80099	0.0155	Yes
AGAP012672-RA	Sulfotransferase	Transferase	2.1384	up	1.30051	3.71601	0.497462	1.06256	0	0	0.1114	No
AGAP006222-RA	UDP glucosyl transferase	Transferase	2.22787	up	0.0914772	-0.39865	3.33899	2.97122	1.07154	0	0.0821	No
AGAP004164-RD	Glutathione S-transferase delta class GSTD1	Transferase	2.30763	up	2.26429	1.68207	1.5068	1.53063	0.394679	0	0.0168	Yes
AGAP003757-RA	CHK kinase-like	Transferase	2.46801	up	2.02069	2.03831	1.64115	1.63735	0.782749	0	0.0092	Yes
AGAP006788-RA	Acyl CoA acyltransferase	Transferase	2.61204	down	-3.02699	-1.67577	-1.75769	-1.89771	0.0320754	0	0.0334	Yes
AGAP002293-RA	Intraflaggelar transport	Transporter	1.84404	up	0.700361	0.543943	0.731698	1.1174	0.452732	0.909859	0.0007	Yes
AGAP005045-RA	Glucose transporter	Transporter	1.87104	up	0.580791	1.24763	1.87572	1.84637	0.0832503	0	0.0411	Yes
AGAP013063-RA	Synaptic vesicle protein	Transporter	1.8974	up	1.38556	1.15815	1.40919	1.50486	0.0086329	0	0.0258	Yes
AGAP002826-RA	Synaptic vesicle protein	Transporter	1.96737	up	1.56738	1.50399	1.41803	1.37745	0.203915	0	0.0175	Yes
AGAP002043-RA	Sugar transporter	Transporter	2.00487	up	0.90058	1.70751	0.775546	1.474	1.45142	0	0.0094	Yes
AGAP013318-RA	Apolipoprotein D	Transporter	1.76566	down	-2.44632	-2.48135	0.369578	0.400359	-0.585009	0	0.0695	No
AGAP007267-RA	tRNA-Gly	tRNA	1.85503	down	0.199075	-0.422372	-1.25322	-1.63058	-1.99005	0	0.0412	Yes
AGAP012794-RA	tRNA-Arg	tRNA	2.36652	down	-2.72628	-2.46075	-0.929213	-1.01071	-0.363723	-0.210201	0.0318	Yes
AGAP013453-RA	Unknown	Unknown	1.82659	up	1.04037	1.04037	1.93661	1.87572	0.0391979	0	0.0351	Yes
AGAP006200-RA	Unknown	Unknown	1.90627	up	1.18387	1.79714	0.140899	0.517335	0.512598	0.769415	0.0191	Yes
AGAP013005-RA	Unknown	Unknown	2.23407	up	0.310198	0.194687	3.11866	3.09418	-0.296069	0.0790005	0.1101	No
AGAP006404-RA	Unknown	Unknown	2.65127	up	0	2.86e-06	4.00298	4.49047	0.374919	0	0.1538	No
AGAP001508-RA	Unknown	Unknown	3.96821	up	0.978953	0.89618	5.00114	5.08034	0	0	0.0974	No
AGAP009309-RA	Unknown	Unknown	1.75001	down	-0.402586	-0.957634	-1.61442	-1.22624	-1.45157	0.328728	0.0061	Yes
AGAP000570-RA	Unknown	Unknown	1.81649	down	-1.30952	-1.40619	-0.856733	-1.07256	-1.48117	-0.106749	0.0042	Yes
AGAP003281-RA	Unknown	Unknown	1.8509	down	-0.915897	-0.641324	-1.24166	-1.20781	-2.88631	0.727619	0.0132	Yes
AGAP012552-RA	Unknown	Unknown	1.89536	down	-0.454569	-0.637228	-1.9791	-2.26404	-0.0879888	0.0086329	0.0719	No
AGAP013493-RA	Unknown	Unknown	2.2753	down	-0.749531	-0.773999	-1.89349	-1.88822	-1.01747	0	0.0169	Yes
AGAP009146-RA	Unknown	Unknown	2.87647	down	-2.21561	-2.57351	-1.44423	-1.57589	-1.18185	0	0.0094	Yes
AGAP010502-RA	Unknown	Unknown	4.84577	down	-3.22134	-3.22654	-2.67379	-3.39481	-0.879273	0	0.0126	Yes
AGAP010502-RB	Unknown	Unknown	5.80116	down	-4.15152	-4.07784	-3.53035	-4.18048	-0.0613675	0.0623412	0.0236	Yes
